# Supplementary material for: Evolution and transformation of vineyard landscapes and promotion of sustainable viticulture. The case of Boukornine protected area in Tunisia
Source: Frontiers journal article supplement (doi:10.3389/fenvs.2025.1614675), 2025-07-22
Supplement: Data_Sheet_1.pdf [file Data_Sheet_1.pdf]

### Supplementary Material

Table S1: Criteria for the farm (EA)

|      | Definition                                                                                                                                                                                                                                          | Character | Resource MED impacted                                                                 | Control points                                  |
|------|-----------------------------------------------------------------------------------------------------------------------------------------------------------------------------------------------------------------------------------------------------|-----------|---------------------------------------------------------------------------------------|-------------------------------------------------|
| EA01 | The company has fewer than 199 employees and annual sales do not exceed 15 million Tunisian dinars (according to Decree No. 2017-389 on financial incentives for investments made under the Investment Act in Tunisia).                             | ESSENTIAL | -                                                                                     | - Operating documents / Articles of association |
| EA02 | The farm's agricultural (viticultural) land is located in the intervention zone defined by Oenomed.                                                                                                                                                 | ESSENTIAL | -                                                                                     | - Farm documents / Land registers               |
| EA03 | The company clearly displays its commitments to the Oenomed Charter by using and making available to its customers the supports provided.                                                                                                           | ESSENTIAL | -                                                                                     | - Observations/ printed copies of posters       |
| EA04 | The company has identified the impact of its activities on Mediterranean heritage resources using the Oenomed self-diagnosis tool.                                                                                                                  | ESSENTIAL | -                                                                                     | - Analysis report<br>- Checklist                |
| EA05 | Through its actions on its physical site, the company contributes to enhancing and highlighting the natural and cultural heritage of the protected area and its local know-how and cultural heritage of the protected area and its local know- how. | IMPORTANT |  | - Observations                                  |

|      |                                                                                                                                                             |           |                                                                                     |                                                                      |
|------|-------------------------------------------------------------------------------------------------------------------------------------------------------------|-----------|-------------------------------------------------------------------------------------|----------------------------------------------------------------------|
| EA06 | At least 25% of the company's workforce has undergone training dedicated to "agro-ecological" practices or developments.                                    | IMPORTANT |  | - Proof to be provided (training certificate, etc.). certificate...) |
| EA08 | The company is involved in at least one network of farmers working collectively towards the agro-ecological transition.                                     | IMPORTANT |  | - Evidence to be submitted                                           |
| EA07 | The company is involved in at least one wine tourism initiative.                                                                                            | ADVISABLE |  | - Evidence to be presented                                           |
| EA09 | The company is committed to limiting and ensuring quality in the creation and/or extension of new farm buildings, based on all current framework documents. | IMPORTANT |  | -                                                                    |

Table S2: Agronomic criteria: Compliance with pre-existing certifications and framework documents

|      | Definition                                                                                                                                                        | Character     | MED resource impacted | Control points |
|------|-------------------------------------------------------------------------------------------------------------------------------------------------------------------|---------------|-----------------------|----------------|
| CA01 | The company complies with the specifications of the Appellation d'Origine Contrôlée en Tunisie (AOC) and/or the Vin délimité de qualité supérieure (VDQS) (Decree | INDISPENSABLE |                       | -              |

Table S 3: Managing virtuous practices

| Virtuous practices |                                          | Resources impacted                                                                                                                                                    | Order of importance |           | Good practices                                                                              | Examples of implementation                                                                                                                                       | Control                                                                      |
|--------------------|------------------------------------------|-----------------------------------------------------------------------------------------------------------------------------------------------------------------------|---------------------|-----------|---------------------------------------------------------------------------------------------|------------------------------------------------------------------------------------------------------------------------------------------------------------------|------------------------------------------------------------------------------|
|                    |                                          |                                                                                                                                                                       | Irrigated           | Dry       |                                                                                             |                                                                                                                                                                  |                                                                              |
| PV01               | Economy and consumption controlled water |     | Desirable           | Essential | Collection of run-off water + The speed reduction of flow of water to increase infiltration | Installation of rain gauges and recording of relative data                                                                                                       | 1. Documentation concerning tanks for water collection or reservoirs storage |
|                    |                                          |                                                                                                                                                                       |                     |           |                                                                                             | Perform 1 single ploughing operation using a vineyard plough to store autumn rains, and 3 shallow ploughings using a vineyard plough and/or Canadian cultivator. | 2. Inspection visit<br>3. Farm diary                                         |
| PV02               |                                          |   | Important           | Important | Alternative scarification of ploughing                                                      |                                                                                                                                                                  | Ploughing the farm                                                           |
| PV03               |                                          |                                                                                    | Desirable           |           | Water-saving in-line underground drip system                                                | Declare the water sources used and provide appropriate documentation concerning regularity (document to be provided when signing the Charter).                   | 1. inspection visit<br>2. operating log                                      |

|      |                    |                                                                                     |           |           |                                                                |                                                                                                                |                                 |
|------|--------------------|-------------------------------------------------------------------------------------|-----------|-----------|----------------------------------------------------------------|----------------------------------------------------------------------------------------------------------------|---------------------------------|
| PV04 | Soil and Landscape |    | Essential |           | Calculation of actual crop requirements                        | Draw up an irrigation program and record irrigation volumes and dates                                          | Farm diary                      |
| PV05 |                    |    | Desirable | Desirable | Adoption of intelligent viticulture                            | Adoption of forecasting models guarantees commitment to reducing treatments and consequently water consumption | 1. Farm diary                   |
|      |                    |                                                                                     |           |           |                                                                | Experimentation with new techniques in synergy with research institutes/universities                           | 2. Inspection visit             |
| PV06 |                    |    | Important | Important | Cultivation of green manures                                   | Planting of legumes such as faba beans                                                                         | Farm diary                      |
| PV07 | Soil and Landscape |    | Important | Desirable | Reduction of tillage and use of practices that replace tillage | Use conservation tillage tools (Chisel, vibrocultivators, disc sprayers, pdf driven tools)                     | Farm diary                      |
| PV08 |                    |  | Essential | Essential | Adoption of organic fertilization                              | Use of organic fertilizers                                                                                     | Farm diary (Fertilization plan) |

|     |                                                                                   |           |           |                                            |                                                                      |            |
|-----|-----------------------------------------------------------------------------------|-----------|-----------|--------------------------------------------|----------------------------------------------------------------------|------------|
| PV9 |  | Desirable | Desirable | Maintain of biodiversity on a global scale | Association composed of plant cover (grass cover, fertilizer, etc.). | Farm diary |
|-----|-----------------------------------------------------------------------------------|-----------|-----------|--------------------------------------------|----------------------------------------------------------------------|------------|

|      |                              |                                                                                   |           |           |                                                    |                                                                                                                                                                                                                                                                                                                                                                                                                                     |                                                                                                                                                                             |
|------|------------------------------|-----------------------------------------------------------------------------------|-----------|-----------|----------------------------------------------------|-------------------------------------------------------------------------------------------------------------------------------------------------------------------------------------------------------------------------------------------------------------------------------------------------------------------------------------------------------------------------------------------------------------------------------------|-----------------------------------------------------------------------------------------------------------------------------------------------------------------------------|
|      |                              |                                                                                   |           |           | <b>of the farm</b>                                 | <p>The use of multi-species cover crops between rows, or every other row, encourages biodiversity. This cover can be composed of crucifers (white mustard, fodder rape), legumes (broad bean, hairy vetch, purple vetch, red clover, Alexandria clover), hydrophyllaceae (phacelia), grasses (rye, oats).</p> <p>Winter cover crops are not at all competitive, as they are destroyed before the vine's peak needs (flowering).</p> |                                                                                                                                                                             |
| PV10 | <b>Control/ conservation</b> | 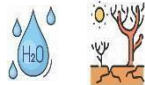 | Essential | Essential | <b>Limitation of use of phytosanitary products</b> | <p>Adopt the principles of <b>integrated</b> defense* principles</p> <p>Preventive protection against powdery mildew and downy mildew, with one treatment per five companions, depending on the year's weather conditions. climatic conditions with preferential use of Sulfur and Bordeaux mixture (contact)</p> <p>Ammonitre (highly soluble nitrogen)</p>                                                                        | <b>Farm diary (phytopathological bulletins technical data sheets for phytosanitary products; purchase invoices for technical means used to control and monitor insects)</b> |

|      |  |                                                                                                                                                                            |           |           |                                                                                                                      |                                                                                                                                                                                                                                                                              |                         |
|------|--|----------------------------------------------------------------------------------------------------------------------------------------------------------------------------|-----------|-----------|----------------------------------------------------------------------------------------------------------------------|------------------------------------------------------------------------------------------------------------------------------------------------------------------------------------------------------------------------------------------------------------------------------|-------------------------|
|      |  |                                                                                                                                                                            |           |           |                                                                                                                      | <p>nitrogen fertilizer) is not recommended for vines, even when irrigated, as it encourages vegetative growth and consequently the development of powdery mildew.</p> <p>Record treatment date, type and commercial name of product, quantity and method of application.</p> |                         |
| PV11 |  | <br>     | Important | Important | <b>Zero herbicides +Use</b><br><br><b>m</b><br><br><b>echanical weeding</b><br><br><b>(hoeing) or manual weeding</b> | Mulching, uncrushed vine shoots left on plots (only if disease-free)                                                                                                                                                                                                         | <b>Farm diary</b>       |
| PV12 |  | <br> | Important | Important | <b>Favoring hedges and windbreaks* on borders</b>                                                                    |                                                                                                                                                                                                                                                                              | <b>Inspection visit</b> |
| PV13 |  | <br> | Important | Important | <b>Planting service plants</b>                                                                                       | It's important to target the pest(s) to be controlled or the beneficials to be favored.                                                                                                                                                                                      | <b>Farm diary</b>       |

**Plants**

pl  
ants;  
the  
tagetes minuta, hairy vetch,



|  |  |  |  |  |                                                                                                                                                                                                                                                                                                                                                                                                                                                                                                                                                                                                                                                                                                                                                  |  |
|--|--|--|--|--|--------------------------------------------------------------------------------------------------------------------------------------------------------------------------------------------------------------------------------------------------------------------------------------------------------------------------------------------------------------------------------------------------------------------------------------------------------------------------------------------------------------------------------------------------------------------------------------------------------------------------------------------------------------------------------------------------------------------------------------------------|--|
|  |  |  |  |  | <p>oats, alfalfa, red clover and birdsfoot trefoil have a nematicidal effect on the nematodes that transmit short-knot disease.</p> <p><b>Trap plants;</b> for example, tansy (<i>Tanacetumvulgare</i>) (<i>Asteraceae</i>) can be used to divert femalefemales of Eudemis (<i>Lobesiabotrana</i>) away from vines</p> <p><b>Plants with a repellent effect;</b> e.g. tagetes, basil, rosemary.</p> <p><b>Reservoir plants reservoirs</b> (allow beneficials to reproduce); for example, roses associated with grapevines allow the <i>Anagrusatomus</i> (an asitoid of the green leafhopp er <i>Empoascavitis</i>) to overwinter in the plot.</p> <p><b>Nectariferous plants:</b> they provide nectar to beneficials whic h feed on it (the</p> |  |
|--|--|--|--|--|--------------------------------------------------------------------------------------------------------------------------------------------------------------------------------------------------------------------------------------------------------------------------------------------------------------------------------------------------------------------------------------------------------------------------------------------------------------------------------------------------------------------------------------------------------------------------------------------------------------------------------------------------------------------------------------------------------------------------------------------------|--|

|  |  |  |  |  |  |                                               |  |
|--|--|--|--|--|--|-----------------------------------------------|--|
|  |  |  |  |  |  | <div><div>vine</div><div>does not</div></div> |  |
|--|--|--|--|--|--|-----------------------------------------------|--|

|      |                      |                                                                                    |           |           |                                                                                                      |                                                                                                                                                                                                                                       |                         |
|------|----------------------|------------------------------------------------------------------------------------|-----------|-----------|------------------------------------------------------------------------------------------------------|---------------------------------------------------------------------------------------------------------------------------------------------------------------------------------------------------------------------------------------|-------------------------|
|      |                      |                                                                                    |           |           |                                                                                                      | producing nectar)                                                                                                                                                                                                                     |                         |
| PV14 | <b>Good Spraying</b> |   | Essential | Essential | <b>Respect the nature of the product</b>                                                             | Use approved products and respect application rates                                                                                                                                                                                   | <b>Farm diary</b>       |
| PV15 |                      |   | Essential | Essential | <b>Alternating to avoid plant resistance to disease</b>                                              |                                                                                                                                                                                                                                       | <b>Farm diary</b>       |
| PV16 |                      |   | Important | Important | <b>Use of fertilizers and pesticides ecological (which protect human health and the environment)</b> |                                                                                                                                                                                                                                       | <b>Farm diary</b>       |
| PV17 |                      |  | Essential | Essential | <b>Correct setting of machine (tractor speed, spray pressure)</b>                                    | Choose the right type of nozzle for the job (flow rate, size); check the condition of nozzles before use (clean or replace defective nozzles); calibrate the sprayer with clean water (choose the right pressure for the right dose). | <b>Self declaration</b> |

|      |                                       |                                                                                    |           |           |                                                                                                  |                                                                                                                                                                                                                     |                                                                                                |
|------|---------------------------------------|------------------------------------------------------------------------------------|-----------|-----------|--------------------------------------------------------------------------------------------------|---------------------------------------------------------------------------------------------------------------------------------------------------------------------------------------------------------------------|------------------------------------------------------------------------------------------------|
|      |                                       |                                                                                    |           |           |                                                                                                  | and forward speed); always double- check the dose applied during and after each application; be rigorous in observing drift); rinse tank and booms thoroughly with ammonia-based products; clean filters regularly. |                                                                                                |
| PV18 |                                       |   | Essential | Essential | <b>Selective sorting and treatment of hazardous waste, cleaning of machines after treatment.</b> | Use of sprayequipment washing areas.<br>Responsible management of solid pollutant waste and collection of pollutant waste by a specialized, authorized company.                                                     | <b>1. Self-declaration</b><br><b>2. Documentation issued by specialized company</b>            |
| PV19 | <b>Techniques and grape varieties</b> |   | Essential | Essential | <b>Favour the indigenous grape varieties</b>                                                     | indigenous grape varieties represent at least 10% of the grape varieties planted in the plot.                                                                                                                       | <b>Farm diary</b>                                                                              |
| PV20 |                                       |  | Important | Important | <b>Introduce drought- and salinity-tolerant grape varieties and rootstocks*.</b>                 |                                                                                                                                                                                                                     | <b>Farm diary (periodic soil and water analyses, origins of grape varieties and rootstocks</b> |

|      |  |                                                                                     |           |           |                                                                                                                                                                                                                                    |                                                                                                                                                                                                  |                                                                 |
|------|--|-------------------------------------------------------------------------------------|-----------|-----------|------------------------------------------------------------------------------------------------------------------------------------------------------------------------------------------------------------------------------------|--------------------------------------------------------------------------------------------------------------------------------------------------------------------------------------------------|-----------------------------------------------------------------|
|      |  |                                                                                     |           |           |                                                                                                                                                                                                                                    |                                                                                                                                                                                                  | used, invoices in case of purchases)                            |
| PV21 |  |    | Essential | Essential | <b>Training of specialized workforce in "agro-ecological" practices or layouts ** At least 50% of the company's workforce has undergone dedicated training in "agro-ecological" practices or layouts (cover management, etc.).</b> | At least 50% of the company's workforce has undergone training dedicated to "agro-ecological" practices or developments (cover crop management, limiting ploughing, favoring MO, biocontrol...). | <b>Provide training certificates / diplomas</b>                 |
| PV22 |  |    | Essential | Essential | <b>Valorization of pruning wood</b>                                                                                                                                                                                                | Production of agricultural compost<br>Prohibit burning of prunings<br>Use of pruning residues as soil conditioners<br>Production of wood chips or fuel                                           | <b>1. Presence of a composting area</b><br><b>2. Farm diary</b> |
| PV23 |  |  | Desirable | Desirable | <b>Use of grape pomace</b>                                                                                                                                                                                                         |                                                                                                                                                                                                  | <b>1. farm diary (fertilization plan)</b>                       |

|      |                                                                     |                                                                                   |           |           |                                                                          |                                                                                                                                                                      |                                                                              |
|------|---------------------------------------------------------------------|-----------------------------------------------------------------------------------|-----------|-----------|--------------------------------------------------------------------------|----------------------------------------------------------------------------------------------------------------------------------------------------------------------|------------------------------------------------------------------------------|
|      |                                                                     |                                                                                   |           |           |                                                                          |                                                                                                                                                                      | <b>2. Declaration of cellar waste tonnage when signing charter</b>           |
| PV24 | <b>Preservation and enhancement of historic monuments and sites</b> |  | Essential | Essential | <b>The company is involved in at least one wine tourism** initiative</b> | Development or restoration work on vernacular heritage<br>Installation of documents and/or explanatory panels<br>Collaboration with the Ministry of Cultural Affairs | <b>1. On-site or virtual inspection visit</b><br><br><b>2. Documentation</b> |

### Legend:

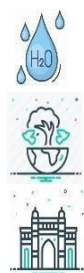

Water

Biodiversity

and historic site

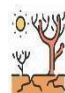

Soil and landscape

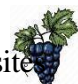

Techniques and grape varieties

\* It would be important to deal with these practices on a case-by-case basis, depending on the company, the conditions and the place of application.

\*\*Mandatory and to be implemented **within one year**.

u  
m  
e  
n  
t  
s  
a

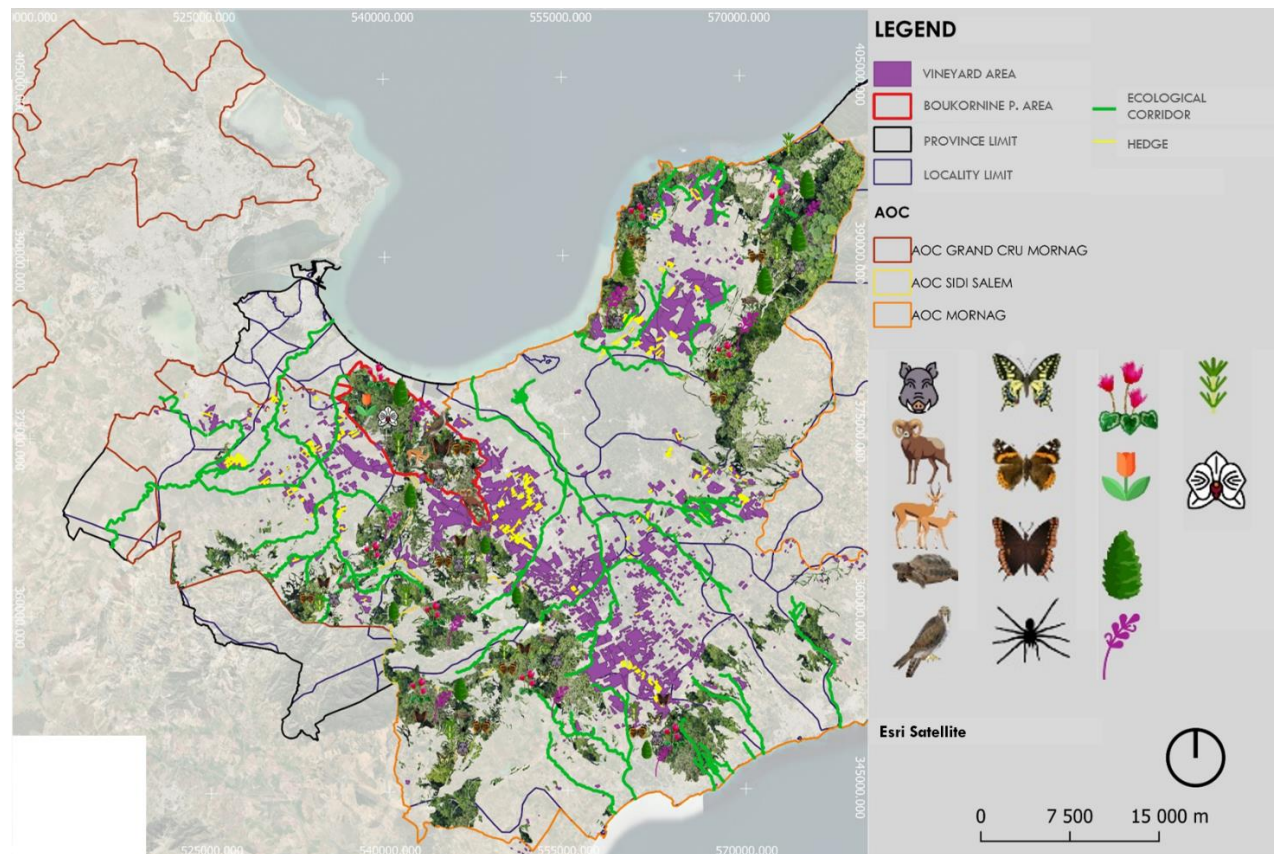

Figure S1. Biodiversity Resources Map.



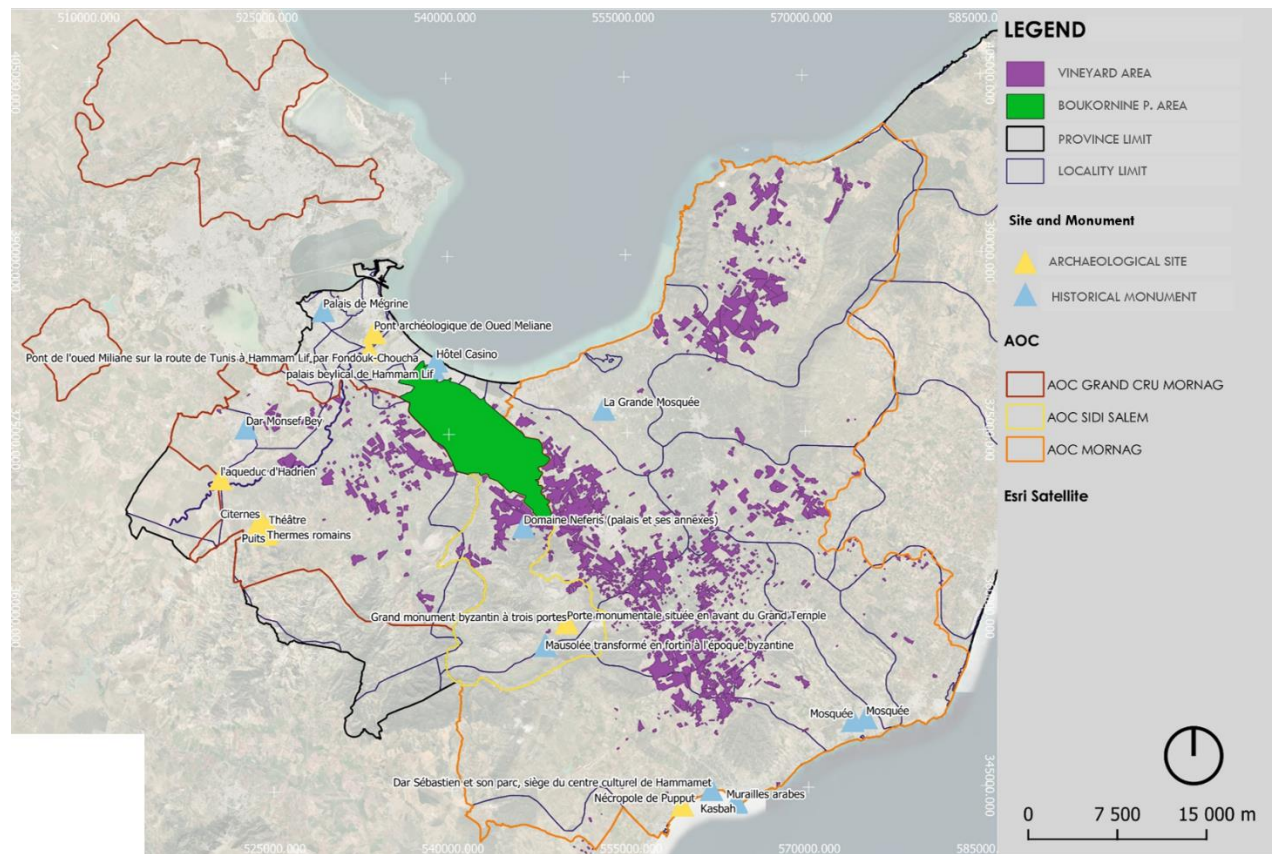

Figure S2. Historical Resources Map.



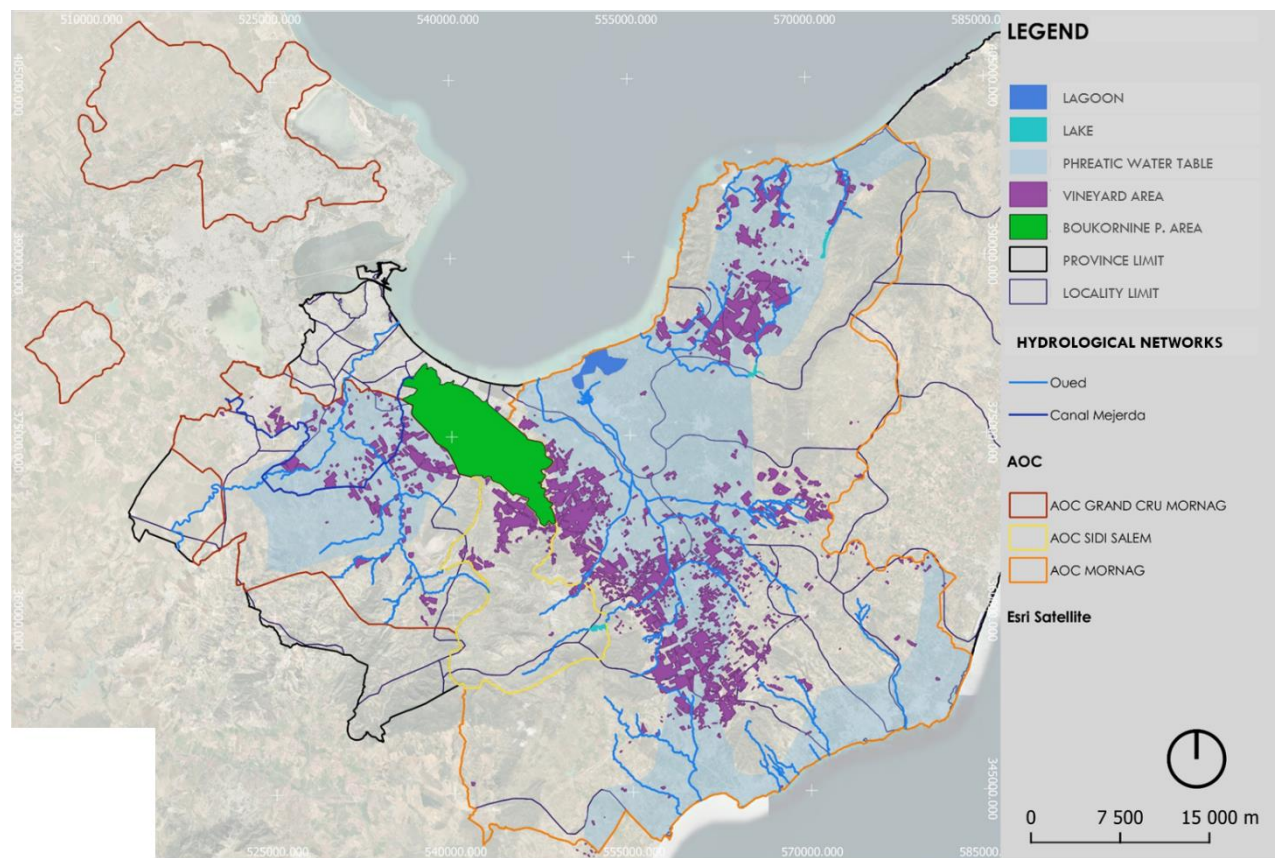

Figure S3. Water Resources Map.

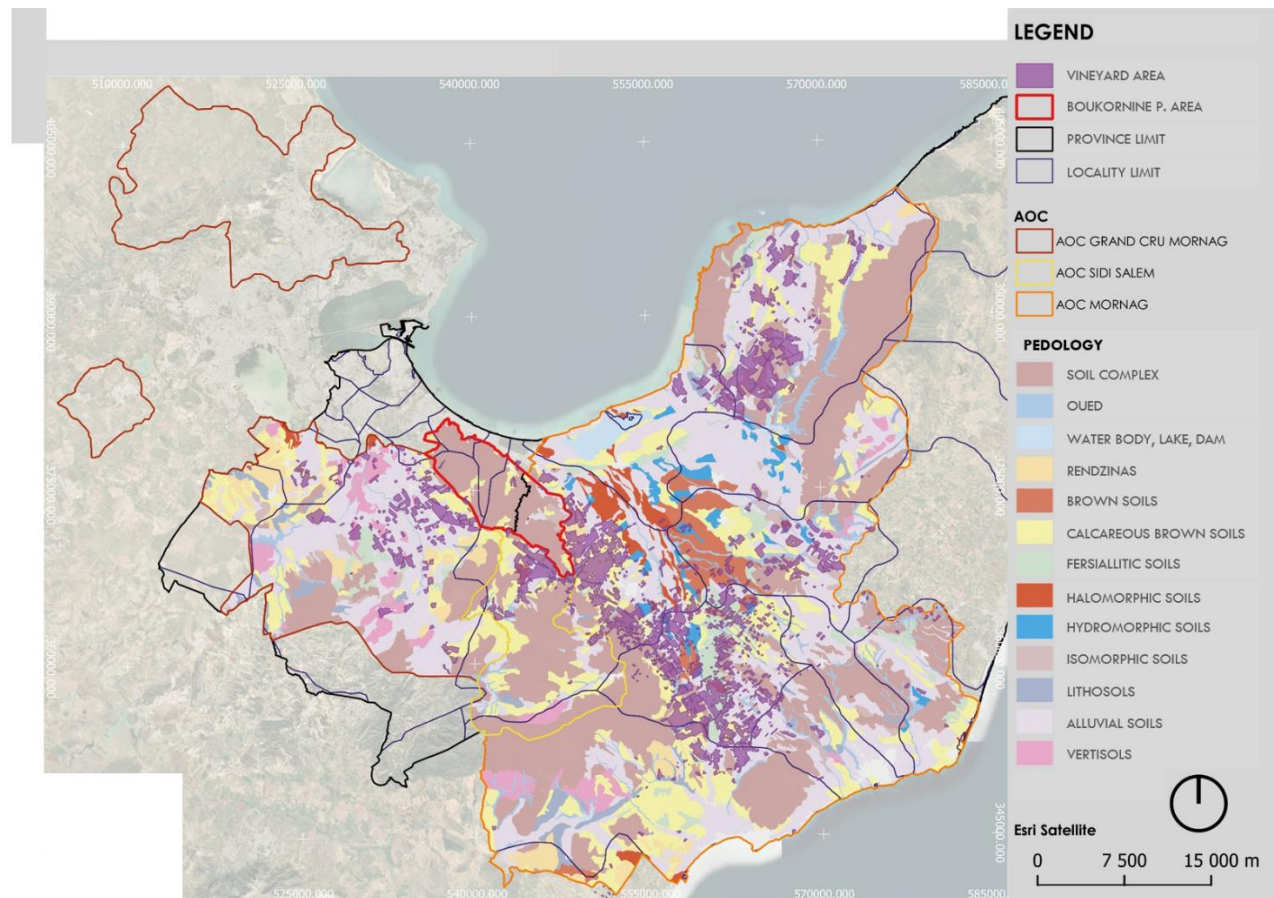

Figure S4. Soil Resources Map.

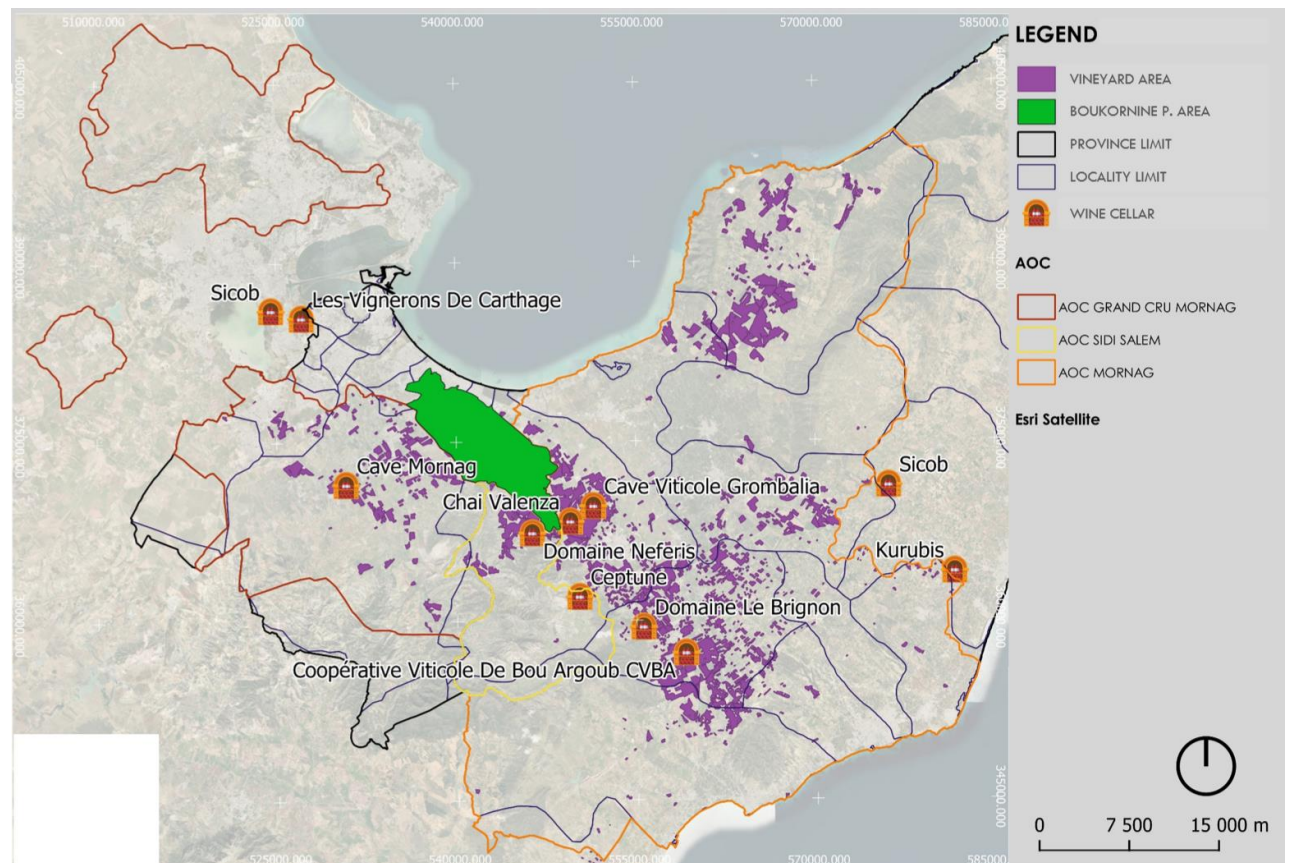

Figure S5. Wine cellar Map.
